# Supplementary material for: Inclusion of unique four-clawed crown-like nitrate–water cluster [(NO3)6(H2O)6]6− anions into the inter-spaces of a 3D H–bonded cationic net formed by a cationic calix[4]arene
Source: Royal Society of Chemistry journal article supplement (doi:10.1039/c1ce05377a), 2011-01-01
Supplement: c1ce05377a.pdf [file c1ce05377a.pdf]

## Electronic Supplementary Information

**Inclusion of unique four-clawed crown-like nitrate-water cluster  
[(NO<sub>3</sub>)<sub>6</sub>(H<sub>2</sub>O)<sub>6</sub>]<sup>6-</sup> anions into the inter-spaces of a 3D H-bonded  
cationic net formed by a cationic calix[4]arene**

**Lei-Lei Liu,<sup>a</sup> Zhi-Gang Ren,<sup>a</sup> Li-Min Wan,<sup>a</sup> Hong-Ye Ding,<sup>a</sup> and Jian-Ping Lang<sup>\*a,b</sup>**

<sup>a</sup> *Key Laboratory of Organic Synthesis of Jiangsu Province, College of Chemistry, Chemical Engineering and Materials Science, Soochow University, Suzhou 215123, Jiangsu, P. R. China.*

<sup>b</sup> *State Key Laboratory of Coordination Chemistry, Nanjing University, Nanjing 210093, P. R. China*

## Table of Contents

|                                                                                                                                                                                                                                                                                                                                                                            |              |
|----------------------------------------------------------------------------------------------------------------------------------------------------------------------------------------------------------------------------------------------------------------------------------------------------------------------------------------------------------------------------|--------------|
| <b>Figure S1.</b> The TGA curves for <b>4</b> (black) and <b>5</b> (red). .....                                                                                                                                                                                                                                                                                            | <b>S3</b>    |
| <b>Figure S2.</b> View of the one-dimensional chain structure formed via H-bonding interactions in <b>4</b> extending along the <i>c</i> axis. ....                                                                                                                                                                                                                        | <b>S3</b>    |
| <b>Figure S3.</b> View of the structure of the [H <sub>3</sub> L] <sup>3+</sup> trication of <b>5</b> . .....                                                                                                                                                                                                                                                              | <b>S4</b>    |
| <b>Figure S4.</b> View of electrostatic interactions (O8···N1 = 3.789(1) Å, O13···N3 = 3.867(5) Å and O6···N4 = 3.948(1) Å, dashed blue lines) among the oxygen atoms (O3, O8 and O13) of NO <sub>3</sub> <sup>-</sup> and N atoms (N1, N3 and N4) of NMe <sub>3</sub> <sup>+</sup> groups in <b>5</b> . Symmetry codes: A, - <i>x</i> , - <i>y</i> , - <i>z</i> + 1. .... | <b>S4</b>    |
| <b>Figure S5.</b> View of the one-dimensional chain structure formed via H-bonding interactions in <b>5</b> extending along the <i>a</i> axis. ....                                                                                                                                                                                                                        | <b>S4</b>    |
| <b>Table S1.</b> Hydrogen-bonding interactions in <b>4</b> and <b>5</b> . ....                                                                                                                                                                                                                                                                                             | <b>S5-S6</b> |

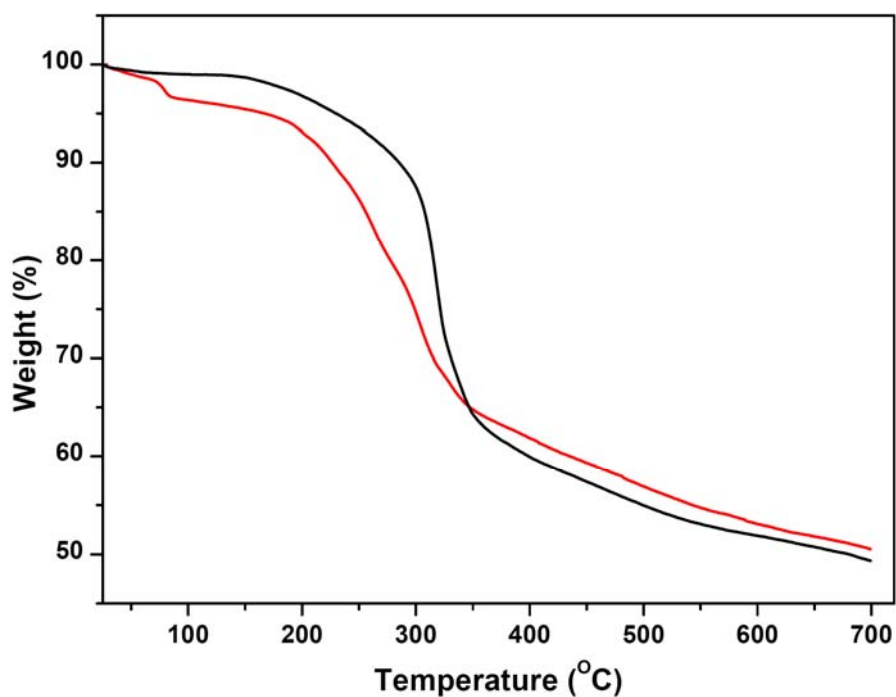

**Figure S1.** The TGA curves for **4** (black) and **5** (red).

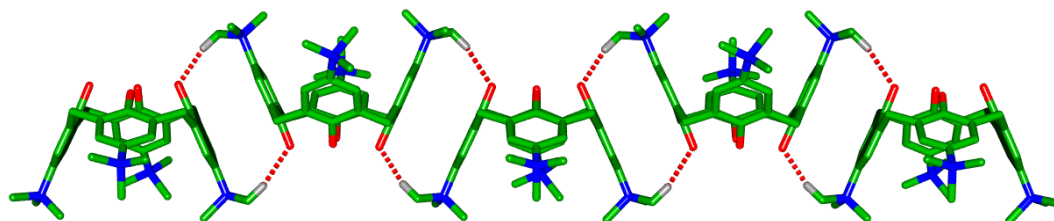

**Figure S2.** View of the one-dimensional chain structure formed via H-bonding interactions in **4** extending along the *c* axis.

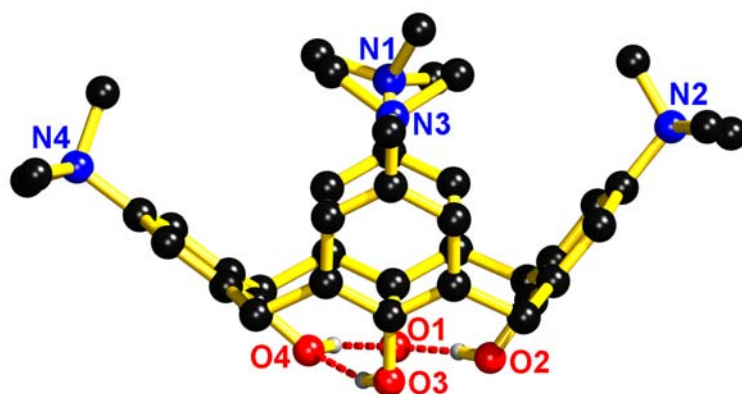

**Figure S3.** View of the structure of the  $[H_3L]^{3+}$  trication of **5**.

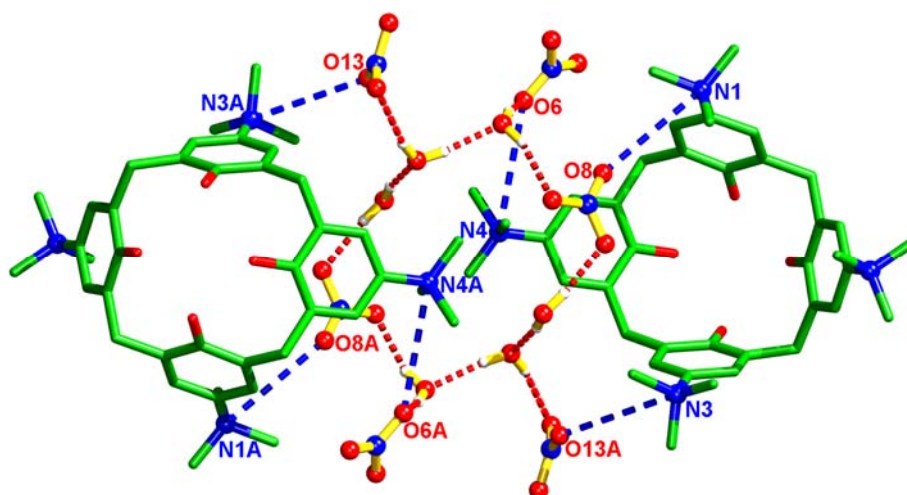

**Figure S4.** View of electrostatic interactions ( $O_8 \cdots N_1 = 3.789(1) \text{ \AA}$ ,  $O_{13} \cdots N_3 = 3.867(5) \text{ \AA}$  and  $O_6 \cdots N_4 = 3.948(1) \text{ \AA}$ , dashed blue lines) among the oxygen atoms ( $O_3$ ,  $O_8$  and  $O_{13}$ ) of  $NO_3^-$  and N atoms ( $N_1$ ,  $N_3$  and  $N_4$ ) of  $NMe_3^+$  groups in **5**. Symmetry codes: A,  $-x$ ,  $-y$ ,  $-z + 1$ .

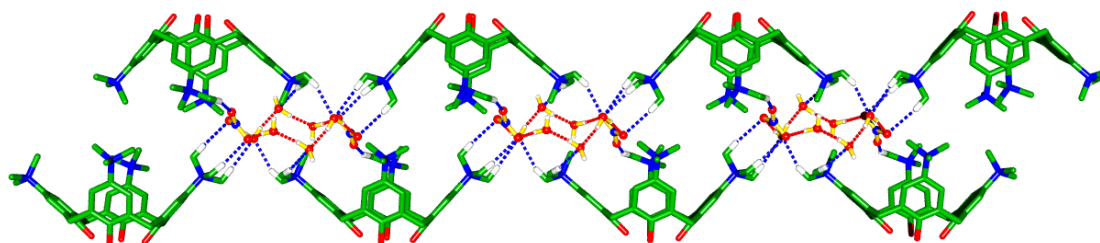

**Figure S5.** View of the one-dimensional chain structure formed via H-bonding interactions in **5** extending along the  $a$  axis.

**Table S1.** Geometry parameters for hydrogen-bonding interactions in **4** and **5**.

| Interactions                | D–H [Å]   | H···A [Å] | D···A [Å] | Angle (D–H···A) [°] |
|-----------------------------|-----------|-----------|-----------|---------------------|
| <b>Compound 2</b>           |           |           |           |                     |
| O1–H1A···O4                 | 0.83(2)   | 1.91(6)   | 2.596(9)  | 139(8)              |
| O2–H2A···O1                 | 0.86(2)   | 1.89(3)   | 2.712(8)  | 161(6)              |
| O4–H4A···O3                 | 0.86(2)   | 1.75(3)   | 2.586(8)  | 163(6)              |
| C7–H7B···O3 <sup>a</sup>    | 0.98      | 2.34      | 3.290(16) | 162.5               |
| C8–H8B···F6 <sup>b</sup>    | 0.98      | 2.45      | 3.342(17) | 151.7               |
| C13–H13···F3 <sup>c</sup>   | 0.95      | 2.51      | 3.40(2)   | 156.6               |
| C15–H15···F14 <sup>d</sup>  | 0.95      | 2.38      | 3.302(14) | 163.5               |
| C18–H18C···F3 <sup>c</sup>  | 0.98      | 2.33      | 3.30(2)   | 173.1               |
| C29–H29A···F4               | 0.98      | 2.49      | 3.39(2)   | 152.6               |
| C29–H29B···O1 <sup>e</sup>  | 0.98      | 2.13      | 3.10(2)   | 167.7               |
| C37–H37A···F1               | 0.98      | 2.46      | 3.36(2)   | 153.4               |
| C38–H38A···F8 <sup>f</sup>  | 0.98      | 2.52      | 3.40(2)   | 148.9               |
| C38–H38B···F1               | 0.98      | 2.52      | 3.411(17) | 150.8               |
| C39–H39B···F7 <sup>f</sup>  | 0.98      | 2.41      | 3.333(16) | 156.2               |
| <b>Compound 3</b>           |           |           |           |                     |
| O2–H2A···O1                 | 0.94(4)   | 1.62(4)   | 2.553(3)  | 171(4)              |
| O3–H3A···O4                 | 0.86(4)   | 1.83(4)   | 2.661(3)  | 163(4)              |
| O4–H4A···O1                 | 0.867(18) | 1.62(2)   | 2.462(3)  | 164(4)              |
| O1W–HW1A···O2W              | 0.85      | 1.93      | 2.768(4)  | 168.2               |
| O1W–HW1B···O10 <sup>a</sup> | 0.85      | 1.98      | 2.819(5)  | 170.5               |
| O2W–HW2A···O3W              | 0.85      | 1.90      | 2.738(5)  | 169.7               |
| O3W–HW3A···O6               | 0.85      | 1.98      | 2.810(4)  | 165.5               |
| O3W–HW3B···O9               | 0.85      | 2.01      | 2.825(5)  | 161.4               |
| C8–H8A···O8                 | 0.97      | 2.42      | 3.330(6)  | 156.8               |
| C9–H9A···O1 <sup>b</sup>    | 0.97      | 2.33      | 3.260(4)  | 160.9               |
| C9–H9B···O12 <sup>c</sup>   | 0.97      | 2.48      | 3.434(9)  | 168.6               |
| C17–H17A···O1W              | 0.97      | 2.55      | 3.505(6)  | 167.1               |
| C18–H18B···O11 <sup>c</sup> | 0.97      | 2.52      | 3.450(10) | 159.8               |
| C18–H18C···O10 <sup>d</sup> | 0.97      | 2.58      | 3.506(7)  | 160.2               |
| C19–H19A···O7 <sup>e</sup>  | 0.97      | 2.51      | 3.390(6)  | 150.4               |
| C19–H19B···O9 <sup>f</sup>  | 0.97      | 2.42      | 3.360(6)  | 163.4               |
| C19–H19C···O2 <sup>g</sup>  | 0.97      | 2.59      | 3.487(6)  | 154.4               |
| C28–H28B···O7 <sup>h</sup>  | 0.97      | 2.44      | 3.339(5)  | 154.5               |

|                             |      |      |          |       |
|-----------------------------|------|------|----------|-------|
| C29–H29A···O13 <sup>i</sup> | 0.97 | 2.46 | 3.371(7) | 156.6 |
| C38–H38A···O2W <sup>i</sup> | 0.97 | 2.46 | 3.405(5) | 165.9 |
| C39–H39A···O3 <sup>j</sup>  | 0.97 | 2.43 | 3.381(4) | 166.1 |
| C39–H39B···O6               | 0.97 | 2.39 | 3.306(4) | 158.0 |
| C39–H39C···O1W              | 0.97 | 2.44 | 3.356(4) | 157.8 |

---

Symmetry codes for **4**: a,  $1 - x, 1 - y, -1/2 + z$ ; b,  $2 - x, 1 - y, -1/2 + z$ ; c,  $3/2 - x, 1/2 + y, -1/2 + z$ ; d,  $3/2 - x, 1/2 + y, 1/2 + z$ ; e,  $1 - x, 1 - y, 1/2 + z$ ; f,  $1/2 + x, 1/2 - y, -1 + z$ .

Symmetry codes for **5**: a,  $-x, -y, 1 - z$ ; b,  $-x, 1 - y, -z$ ; c,  $-x, 1 - y, 1 - z$ ; d,  $1 - x, 1 - y, 1 - z$ ; e,  $1 + x, y, z$ ; f,  $1 - x, 1 - y, 1 - z$ ; g,  $1 - x, 1 - y, -z$ ; h,  $1 + x, y, z$ ; i,  $-x, -y, 1 - z$ ; j,  $-x, -y, -z$ .

---
